# Supplementary material for: The Interplay of Digital Access and Socioeconomic Inequality in Maternal Health Service Utilization in Togo: Evidence from the Multiple Indicator Cluster Survey using Survey-Weighted Analysis
Source: Research Square preprint supplement (doi:10.21203/rs.3.rs-8635479/v1), 2026-02-12
Supplement: Supplementary file 1 [file c774778b916e9bcca1f7be0a.docx]

Table S1: Weighted bivariate associations between media exposure/internet use and maternal health-seeking behaviors

| **Exposure Variable** | **Outcome Variable** | **Category** | **Weighted Prevalence (%)** | **95% Confidence Interval** | **Rao–Scott χ²** | **df** | **p-value** |
| --- | --- | --- | --- | --- | --- | --- | --- |
| **Internet use** | **Facility delivery** | Yes | 98.5 | (96.82-100.00) | 57.24 | 1 | <0.001** |
| **Media exposure** | **Facility delivery** | Yes | 87.2 | (83.46-90.96) | 47.08 | 1 | <0.001** |
| **Internet use** | **≥4 ANC visits** | Yes | 77.0 | (69.62-84.46) | 25.06 | 1 | <0.001** |
| **Media exposure** | **≥4 ANC visits** | Yes | 64.5 | (60.31-68.71) | 34.90 | 1 | <0.001** |
| **Internet use** | **PNC within 48 hours** | Yes | 65.2 | (56.99-73.35) | 0.09 | 1 | 0.760 |
| **Media exposure** | **PNC within 48 hours** | Yes | 64.6 | (60.38-68.90) | 3.12 | 1 | 0.078 |

*Note: * p* < 0.050 (statistically significant), ** *p* < 0.001 (highly statistically significant)

Table S2: Adjusted Odds Ratios for Predictors of Adequate ANC Utilization (ANC ≥ 4 visits) with Interaction Term (Internet Use × Residence)

| Predictor | AOR | 95% CI | p-value |
| --- | --- | --- | --- |
| Internet use (Yes vs No) | 0.74 | 0.28 – 2.06 | 0.548 |
| Residence (Urban vs Rural) | 0.89 | 0.59 – 1.38 | 0.593 |
| Internet use × Urban residence | 1.99 | 0.67 – 5.89 | 0.221 |
| Age group |  |  |  |
| 20–24 vs 15–19 | 1.29 | 0.74 – 2.25 | 0.361 |
| 25–29 vs 15–19 | **1.96** | 1.14 – 3.36 | 0.016* |
| 30–34 vs 15–19 | **2.17** | 1.19 – 3.97 | 0.012* |
| 35–39 vs 15–19 | 1.68 | 0.87 – 3.24 | 0.123 |
| 40–44 vs 15–19 | 1.96 | 0.99 – 3.89 | 0.054 |
| 45–49 vs 15–19 | 1.08 | 0.31 – 3.73 | 0.906 |
| Education |  |  |  |
| Primary vs None | 1.00 | 0.75 – 1.34 | 0.994 |
| Secondary+ vs None | 1.35 | 0.92 – 1.98 | 0.125 |
| Wealth Index |  |  |  |
| Poorer vs Middle | 0.74 | 0.49 – 1.10 | 0.133 |
| Poorest vs Middle | 0.87 | 0.57 – 1.32 | 0.510 |
| Richer vs Middle | 1.00 | 0.66 – 1.52 | 0.996 |
| Richest vs Middle | 1.40 | 0.89 – 2.21 | 0.142 |
| Parity |  |  |  |
| 3+ vs 1–2 | 0.78 | 0.57 – 1.08 | 0.140 |
| Mobile phone use (Yes vs No) | **1.91** | 1.46 – 2.50 | <0.0001** |
| Model Fit Statistics: AIC = 2446.1; –2 Log L = 2410.1; c-statistic = 0.648. | | | |

*Note: * p* < 0.050 (statistically significant), ** *p* < 0.010 (highly statistically significant)

Table S3: Odds Ratio Estimates from Sensitivity Analysis (Laptop use MT4 instead of Internet use MT9)

| Effect | Point Estimate (AOR) | 95% Confidence Limits |
| --- | --- | --- |
| MT4 Yes vs No | 1.307 | 0.751-2.273 |
| Media_Exposure Yes vs No | 1.376 | 1.033-1.834 |
| Age 20-24 vs 15-19 | 1.383 | 0.788-2.428 |
| Age 25-29 vs 15-19 | 1.925 | 1.126-3.291 |
| Age 30-34 vs 15-19 | 2.175 | 1.215-3.896 |
| Age 35-39 vs 15-19 | 1.675 | 0.870-3.224 |
| Age 40-44 vs 15-19 | 1.968 | 0.996-3.890 |
| Age 45-49 vs 15-19 | 1.112 | 0.320-3.869 |
| Education Primary vs No education | 1.065 | 0.796-1.426 |
| Education Secondary or Higher vs None | 1.492 | 1.020-2.182 |
| Wealth Poorer vs Middle | 0.697 | 0.466-1.042 |
| Wealth Poorest vs Middle | 0.804 | 0.529-1.221 |
| Wealth Richer vs Middle | 1.072 | 0.692-1.662 |
| Wealth Richest vs Middle | 1.547 | 0.999-2.396 |
| Urban vs Rural | 0.997 | 0.660-1.507 |
| Parity 3+ vs 1–2 | 0.829 | 0.602-1.141 |

Table S4: Unweighted prevalence of key exposures and maternal health outcomes (N = 7,657)

| **Variable** | **Category** | **Frequency (n)** | **Percent (%)** |
| --- | --- | --- | --- |
| **Media Exposure** | Yes | 4,245 | 55.44 |
|  | No | 3,081 | 40.24 |
| **Internet Use (MT9)** | Yes | 975 | 12.73 |
|  | No | 6,153 | 80.36 |
| **Mobile Use (MT11)** | Yes | 4,025 | 52.57 |
|  | No | 3,301 | 43.11 |
| **Laptop Use (MT4)** | Yes | 698 | 9.12 |
|  | No | 6,628 | 86.56 |
| **Place of Residence (HH6)** | Urban | 3,202 | 41.82 |
|  | Rural | 4,442 | 58.01 |
| **Highest Educational Level (welevel)** | No education | 2,048 | 26.75 |
|  | Primary | 2,327 | 30.39 |
|  | Secondary or higher | 2,951 | 38.54 |
| **Wealth Index (windex5)** | Poorest | 1,297 | 16.94 |
|  | Poorer | 1,375 | 17.96 |
|  | Middle | 1,470 | 19.20 |
|  | Richer | 1,481 | 19.34 |
|  | Richest | 1,703 | 22.24 |
| **Skilled Birth Attendance (SBA)** | Yes | 1,328 | 17.34 |
|  | No | 6,329 | 82.66 |
| **ANC ≥ 4 Visits** | Yes | 1,110 | 14.50 |
|  | No | 800 | 10.45 |
| **Facility Delivery** | Yes | 1,543 | 20.15 |
|  | No | 445 | 5.81 |
| **PNC within 48 hours** | Yes | 1,059 | 13.83 |
|  | No | 494 | 6.45 |

Table S5: Weighted Sample size

| Data Summary | Value |
| --- | --- |
| Number of Strata | 12 |
| Number of Clusters | 420 |
| Number of Observations | 7657 |
| Number of Observations Used | 7326 |
| Number of Obs with Nonpositive Weights | 331 |
| Sum of Weights | 7326 |
